# Supplementary material
Source: Springer Nature journal article supplement (https://www.springermedizin.de/resource/supplementary/12891_2010_1110_MOESM1_ESM.pdf/9507760)

## Changes in PA level of injured teenagers

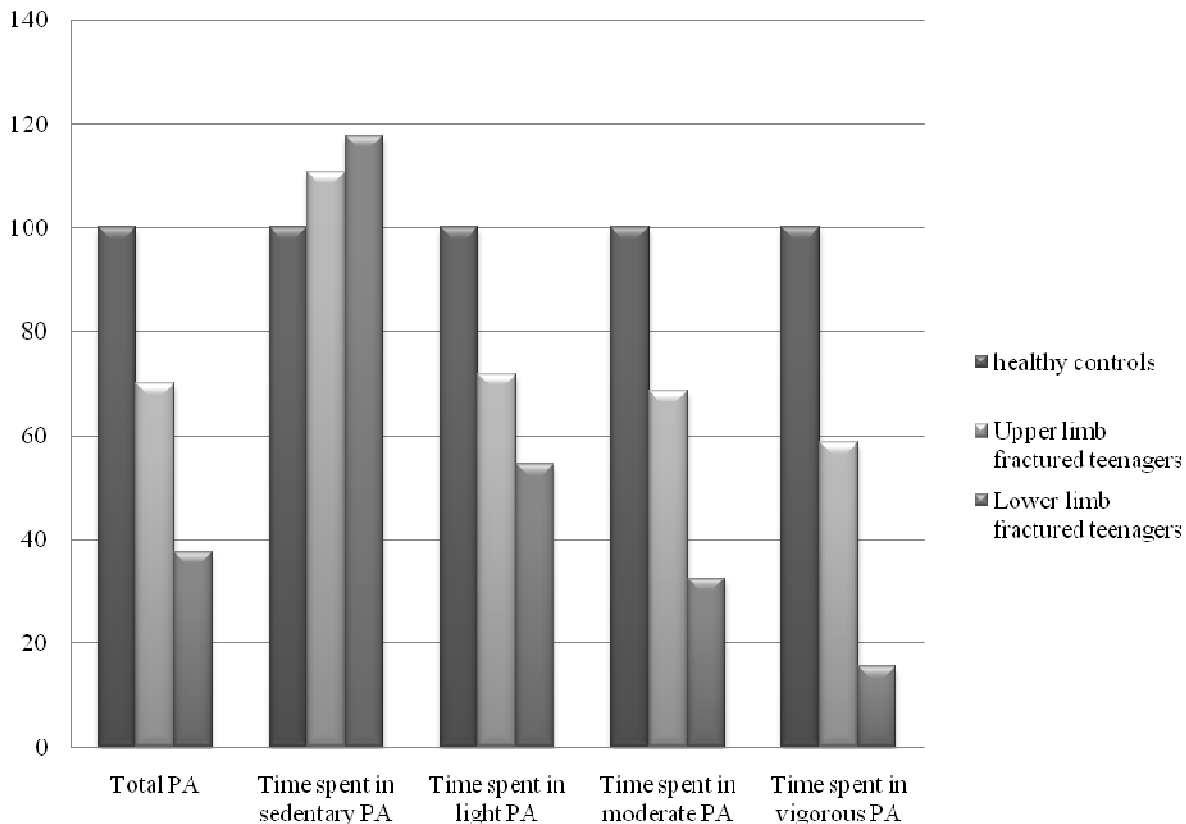

Supplement: MOESM1 [file 9507760]
